# Inhibition of adipose triglyceride lipase (ATGL) by the putative tumor suppressor G0S2 or a small molecule inhibitor attenuates the growth of cancer cells

Rachid Zagani<sup>1</sup>, Wissal El-Assaad<sup>1</sup>, Isabelle Gamache<sup>1</sup> and Jose G. Teodoro<sup>1,2</sup>

<sup>1</sup> Goodman Cancer Research Centre, McGill University, Montréal, QC, Canada

<sup>2</sup> Department of Biochemistry, McGill University, Montréal, QC, Canada

Correspondence to: Jose G. Teodoro, email: jose.teodoro@mcgill.ca

Keywords: lipase, ATGL, G0S2, metabolism, lipids, triglycerides, tumor suppressor

Received: January 22, 2015

Accepted: July 03, 2015

Published: July 31, 2015

This is an open-access article distributed under the terms of the Creative Commons Attribution License, which permits unrestricted use, distribution, and reproduction in any medium, provided the original author and source are credited.

## ABSTRACT

**The G0/G1 switch gene 2 (G0S2) is methylated and silenced in a wide range of human cancers. The protein encoded by G0S2 is an endogenous inhibitor of lipid catabolism that directly binds adipose triglyceride lipase (ATGL). ATGL is the rate-limiting step in triglyceride metabolism. Although the G0S2 gene is silenced in cancer, the impact of ATGL in the growth and survival of cancer cells has never been addressed. Here we show that ectopic expression of G0S2 in non-small cell lung carcinomas (NSCL) inhibits triglyceride catabolism and results in lower cell growth. Similarly, knockdown of ATGL increased triglyceride levels, attenuated cell growth and promoted apoptosis. Conversely, knockdown of endogenous G0S2 enhanced the growth and invasiveness of cancer cells. G0S2 is strongly induced in acute promyelocytic leukemia (APL) cells in response to all trans retinoic acid (ATRA) and we show that inhibition of ATGL in these cells by G0S2 is required for efficacy of ATRA treatment. Our data uncover a novel tumor suppressor mechanism by which G0S2 directly inhibits activity of a key intracellular lipase. Our results suggest that elevated ATGL activity may be a general property of many cancer types and potentially represents a novel target for chemotherapy.**

## INTRODUCTION

Reprogramming of metabolic networks is an emerging hallmark of cancer cells [1]. For example, enhanced glycolysis (Warburg effect), is a very general property of tumor cells [2]. Reprogramming of lipid metabolism is not as well understood although several studies suggest that these pathways are also extensively altered in cancer cells. Lipogenesis is markedly increased in cancer cells [3-9]. Enzymes of lipid biosynthesis, including ATP-citrate lyase, fatty acid synthase, acetyl-CoA carboxylase-1, dicarboxylate transporter and malic enzyme are upregulated in many cancer types and abrogation of their activity often leads to apoptosis and/or growth arrest [3-9].

Fatty acids (FA) in most tissues are first converted to triglycerides (TGs) and stored in specialized organelles called lipid droplets. TGs are synthesized by the

condensation of three fatty-acyl moieties to glycerol. The hydrolysis and mobilization of FA from TGs, is controlled by specific lipases in the triglyceride/free fatty acid (TG/FFA) cycle. The TG/FFA cycle is a coordinated cycle of lipid catabolism breaking down TGs stepwise into FFAs and glycerol. The intracellular lipolytic pathway is regulated by a series of enzymes each responsible of hydrolyzing a specific lipid molecule. Adipose triglyceride lipase (ATGL), initiates the process of TG metabolism by hydrolyzing TGs into diacylglycerol (DAG) and FA [10-12]. The subsequent step requires hormone sensitive lipase (HSL) which breaks down DAG into monoacylglycerol (MAG) and FA [13]. Finally, MAG is further broken down into FA and glycerol by monoacylglycerol lipase (MAGL) [14].

The TG/FFA cycle appears to be accelerated in cancer with activity of both the synthetic and catabolic arms becoming elevated. MAGL activity was recently shown to be dramatically upregulated in human cancer

which rendered tumor cells highly aggressive [15]. MAGL expression is elevated several fold in ductal breast cancer cells and was shown to play a role in the epithelial-to-mesenchymal transition of prostate cancer cells [16]. MAGL regulates a network of oncogenic signaling lipids, which likely promote migration, invasion, and tumour growth [15, 17]. MAGL was also shown to be essential for the proliferation and tumorigenicity of colorectal cancer cells as either its inhibition or deletion led to attenuated tumour growth and cancer cell proliferation [18]. Although the importance of elevated MAGL activity in cancer has been demonstrated, the rate-limiting enzyme of TG catabolism is ATGL and thus far no mechanism has been proposed suggesting how this initiating enzyme in TG lipolysis becomes elevated in cancer.

The G<sub>0</sub>/G<sub>1</sub> switch gene 2 (*G0S2*) encodes an endogenous inhibitor of ATGL [19]. The name *G0S2* derives from the fact that it was initially identified in monocytes as a gene upregulated during transition from G<sub>0</sub> to G<sub>1</sub> phases of the cell cycle [20, 21]. The *G0S2* gene encodes a small 12kDa protein that localizes to the mitochondria and endoplasmic reticulum [22, 23] and is expressed in most tissues, with the highest levels in adipose tissues and liver [19]. *G0S2* directly inhibits lipase activity by interacting with the N-terminal patatin domain of ATGL [24]. Three properties of *G0S2* suggest that the protein functions as a tumor suppressor. First, the *G0S2* gene has a potent CpG island in the promoter region [20] and work from several groups have demonstrated that the gene is silenced in many types of human cancer including head and neck cancer [25], glioma [26] lung [27, 28] and breast cancer [22]. Second, ectopic expression of *G0S2* in a variety of human tumor cells promotes cell death [22] and can also inhibit proliferation of hematopoietic stem cells and CML [29, 30]. Lastly, knockdown of *G0S2* expression in primary mouse embryo fibroblasts was shown to enhance oncogene-induced cell transformation [22]. Although *G0S2* has the properties of a tumor suppressor, it has never been determined if ATGL inhibition is required for *G0S2* mediated suppression of cell growth.

In the current study we show that the tumor suppressor properties of *G0S2* are derived at least in part from its capacity to inhibit ATGL. Inhibition of ATGL by *G0S2*, RNAi, or a small molecule inhibitor was able to attenuate the growth and motility of tumor cells. These data show that *G0S2* encodes a tumour suppressor protein that links regulation of lipid catabolism to cell transformation and suggests that ATGL may be a novel target to limit growth of tumour cells.

## RESULTS

### Ectopic expression of *G0S2* results in elevated cellular TG levels and inhibits the growth, survival and motility of cancer cells

*G0S2* has the general properties of a tumor suppressor protein and appears to play a major role in lipid metabolism by binding ATGL and suppressing lipase activity [31-33]. It is not known if the growth inhibitory properties of *G0S2* stem from its ability to inhibit ATGL or other functions. To further study the tumor suppressor activity of *G0S2*, non-small cell lung carcinoma (NSCL) cell lines that stably express *G0S2* were generated. NSCL cells were selected as a model since the *G0S2* gene was shown to be methylated and silenced in this cancer type and re-expression of the gene was shown to induce death [22, 27, 28]. A549 and HOP62 cells were transduced with retrovirus expressing either FLAG-tagged *G0S2* or empty vector controls (EV). Figure 1A and 1B show that *G0S2* expression resulted in slower growth in both A549 and HOP62 lines. In addition to slow growth, *G0S2* expressing cell lines also displayed greater sensitivity to the chemotherapy agent Camptothecin (Figure 1C and 1D). Expression of FLAG-*G0S2* in the cell lines was confirmed by western blot analysis using anti-FLAG antibody (Figure 1E).

In order to determine if expression of *G0S2* was able to inhibit the lipase activity of ATGL, A549 cells were loaded with oleic acid for 5 hours and total cellular triglyceride (TG) levels were measured and normalized to total protein. Figure 1F shows that A549 cells expressing *G0S2* maintained significantly more TG relative to EV control. *G0S2* was previously shown to directly interact with ATGL in metabolic tissues such as adipose tissue and liver [19]. In figure 1G we show using co-immunoprecipitation that FLAG-*G0S2* also forms a complex with endogenous ATGL in A549 cells. These data show that re-expression of *G0S2* in NSCL cell lines, which is commonly methylated and silenced in these cells, results in slow growth, increased susceptibility to apoptosis and accumulation of TG through ATGL inhibition.

### Knockdown of *G0S2* enhances cell growth and motility in colorectal cancer cells

The study of endogenous *G0S2* in cancer cells is complicated by the fact that the gene is highly methylated and silenced in most tumor-derived cell lines. Although we were unable to detect *G0S2* protein in NSCL cell lines, the colorectal cell line HT29 did show an appreciable immunoblot signal for *G0S2*. Figure 2A shows that when expression of *G0S2* is silenced in HT29 cells using a stable shRNA, cell growth is significantly increased. Expression

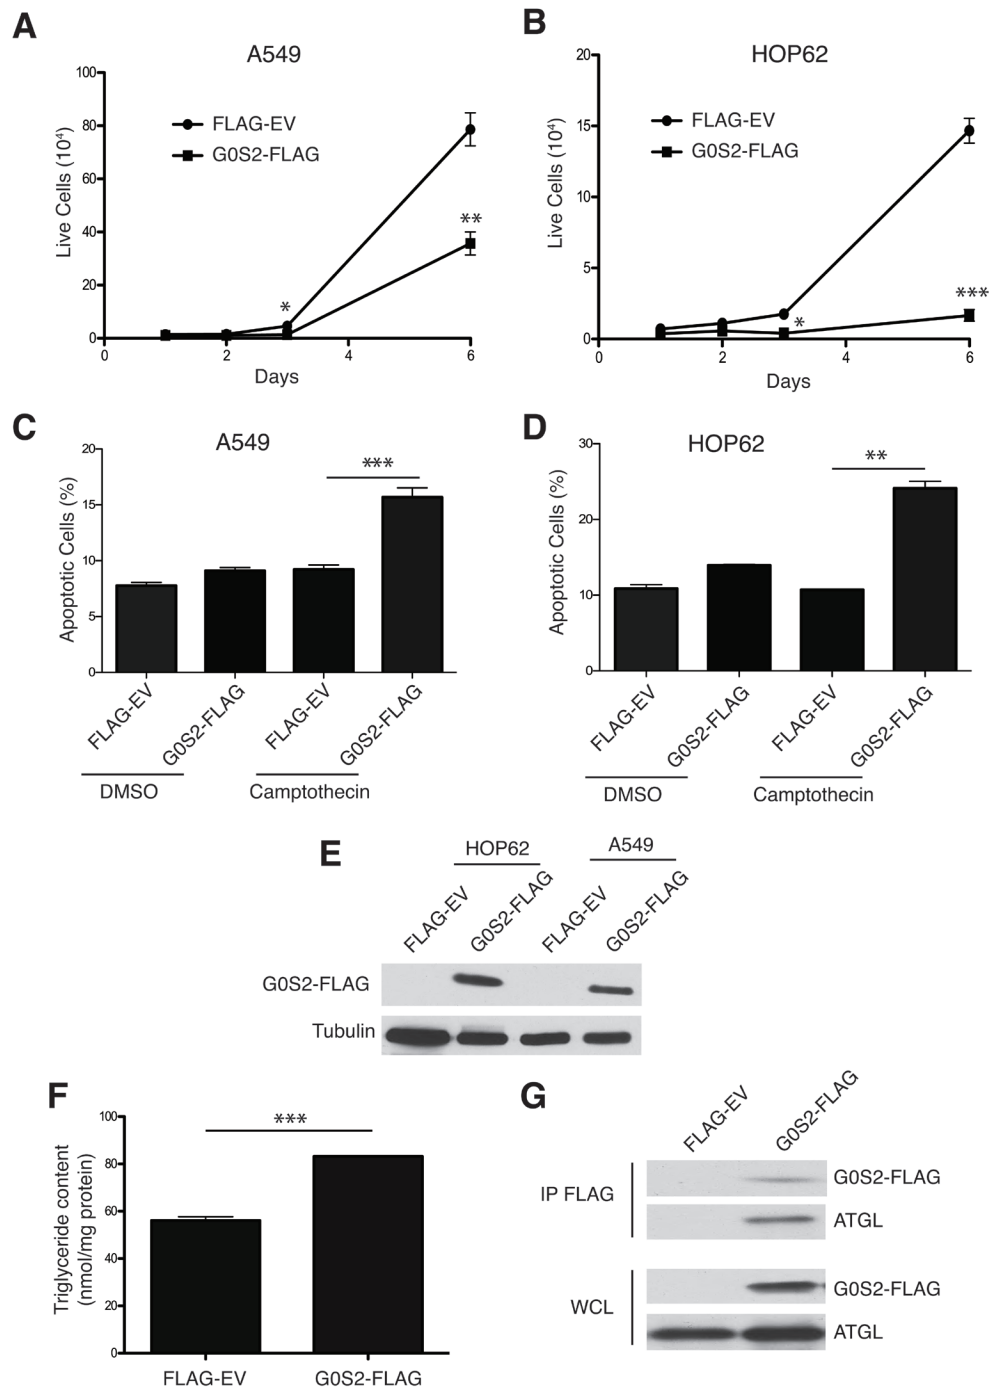

**Figure 1: Ectopic expression of G0S2 results in elevated cellular TG levels and inhibits the growth, survival and motility of cancer cells.** A.-B. Growth curves of polyclonal populations of A549 (panel A) and HOP62 (panel B) cells stably transduced with either pBABE Flag-tagged G0S2 (G0S2-FLAG) or empty vector (Flag-EV) retrovirus. Equal number of cells stably expressing G0S2-Flag or Flag-EV were seeded in a 12 well plate and counted on the indicated days. C.-D. A549 (panel C) or HOP62 (panel D) cells stably expressing G0S2 or empty pBABE were treated for 24h with camptothecin (10  $\mu$ m) or vehicle control. Cell death was monitored by flow cytometry using Annexin V and 7AAD staining. The percentage of apoptotic cells (Annexin-positive) is indicated. E. Whole cell lysates from HOP62 and A549 stable cell populations were separated by SDS-PAGE and levels of G0S2 were determined by immunoblotting with anti-FLAG antibody. F. A549 cells stably expressing G0S2-FLAG or empty vector were incubated in 300  $\mu$ M oleic acid for 5 hr and the intracellular triglyceride content was determined 4 hours later. The data were normalized to protein concentration in the cell extracts. G. A549 cells stably expressing G0S2-FLAG or empty vector were lysed and cell extracts were immunoprecipitated using anti-FLAG antibody. IPs and whole cell lysates (WCL) were analyzed by immunoblotting using antibodies to detect G0S2 (FLAG) and endogenous ATGL.

and knockdown of G0S2 was confirmed by immunoblot against endogenous G0S2 (Figure 2B). In addition to cell growth, the motility of HT29 G0S2 knockdown cells was

also enhanced as measured using scratch assays (Fig 2C and 2D).

Since G0S2 is thought to exert effects on lipid

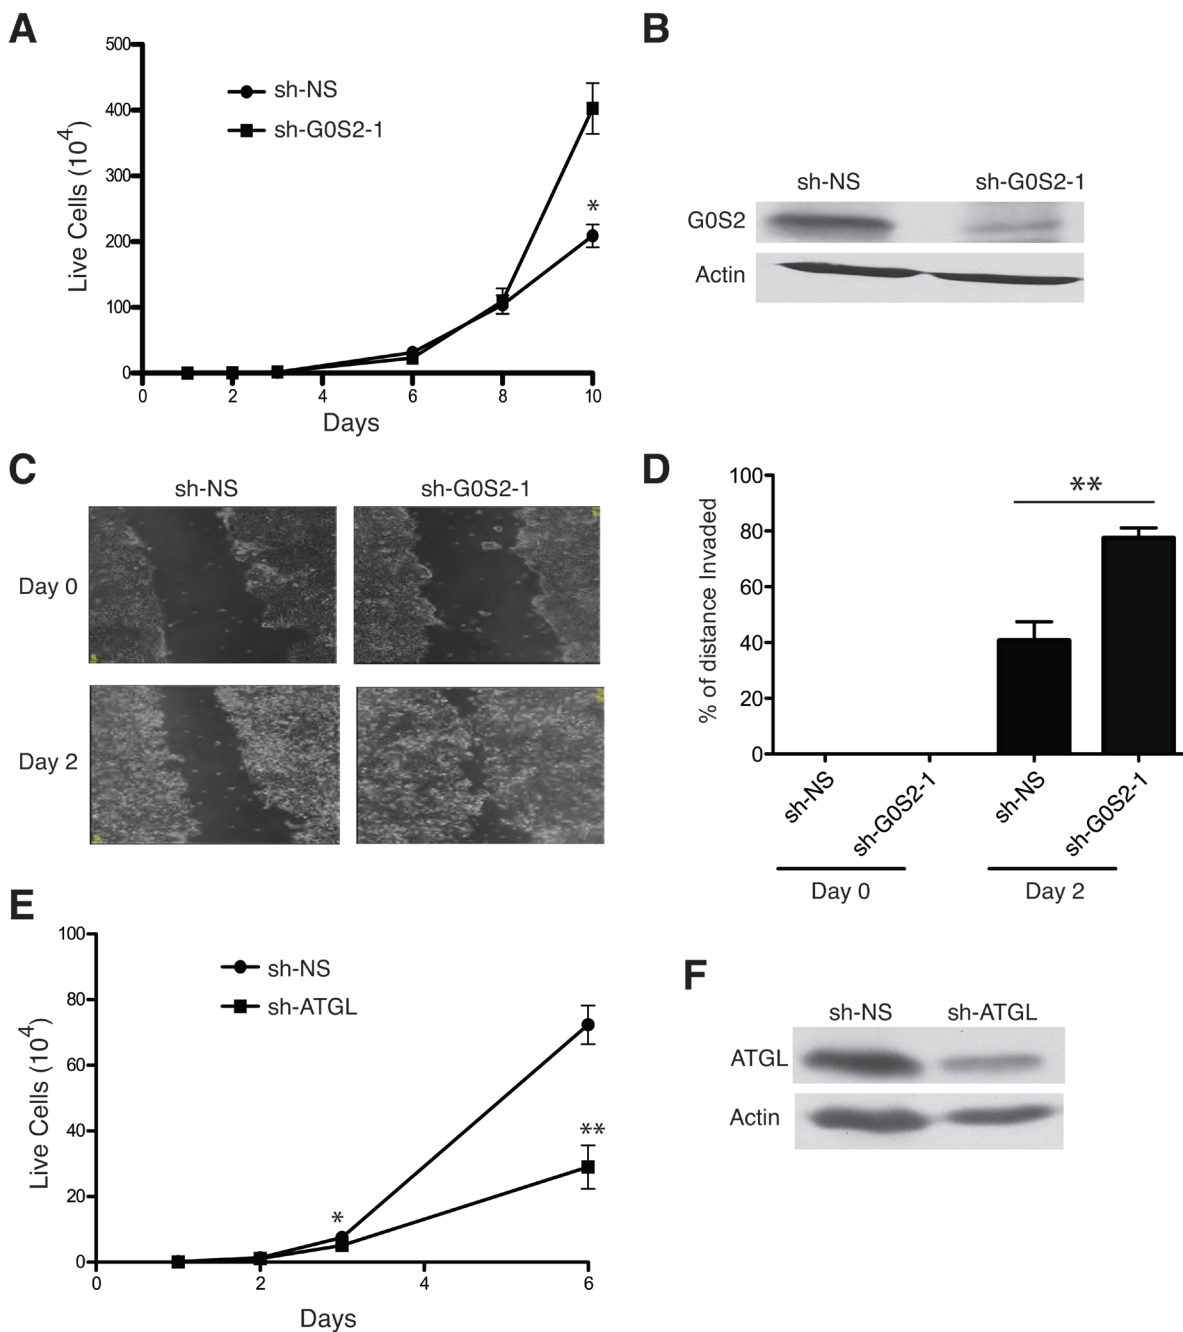

**Figure 2: Knockdown of G0S2 enhances cell growth and motility in colorectal cancer cells.** **A.** Growth curves of HT29 transduced with lentiviral vectors encoding an shRNA targeting G0S2 (sh-G0S2) or a non-silencing control (sh-NS). Cells were seeded in a 12 well plate and counted on the indicated days. **B.** shG0S2 and sh-NS cells were analyzed by immunoblotting to detect the expression level of endogenous G0S2 protein in whole cell lysates.  $\beta$ -actin was used as a loading control. **C.** *In vitro* scratch assay using sh-G0S2 and sh-NS cells showing images captured at 0 and 2 days after scratching. **D.** Quantitation of motility from the scratch assays shown in panel C. Motility was calculated as described in the materials and methods. **E.** Growth curve of HT29 cells stably transduced with an shRNA targeting ATGL or sh-NS. **F.** ATGL protein expression was analyzed in whole cell lysates by immunoblotting with anti-ATGL antibody.  $\beta$ -actin was used as a loading control.

metabolism by binding and inhibiting ATGL, we hypothesized that knockdown of ATGL would have similar biological effects as ectopic expression of G0S2. Figure 2E shows that knockdown of ATGL using a stable shRNA hairpin significantly inhibited the growth of HT29 cells. Knockdown of ATGL was confirmed by western blot analysis shown in figure 2F. These data indicate that elevated ATGL activity in tumor cells enhances the growth properties of the cells and that inhibition of ATGL by either expression of G0S2 or knockdown of ATGL results in slower cell growth.

### ATGL knockdown inhibits cell growth, motility and promotes apoptosis

Since G0S2 overexpression resulted in elevated TG levels in A549 and HOP62 cells, we hypothesized

that ATGL inhibition may explain some of the tumor suppressor properties displayed by G0S2 in NSCL. In order to test this hypothesis we determined if knockdown of ATGL expression using RNAi affected the growth properties of NSCL carcinoma cell lines. Figure 3A shows that stable expression of short hairpin RNAs (shRNA) inhibiting ATGL expression significantly inhibited the growth of three different NSCL lines (HOP92, HOP62 and A549) relative to non-silencing (NS) control. In order to confirm that ATGL enzymatic activity was being affected in the knockdown cells, total TG levels were measured and normalized to total protein. Figure 3B shows that TG levels were significantly elevated in ATGL knockdown cells indicating that the capacity of ATGL to hydrolyze TG in these cells was compromised. Knockdown of ATGL in these cells was confirmed by western blot (Figure 3C). Since we previously observed that expression of G0S2 could induce cell death or sensitize cells to killing

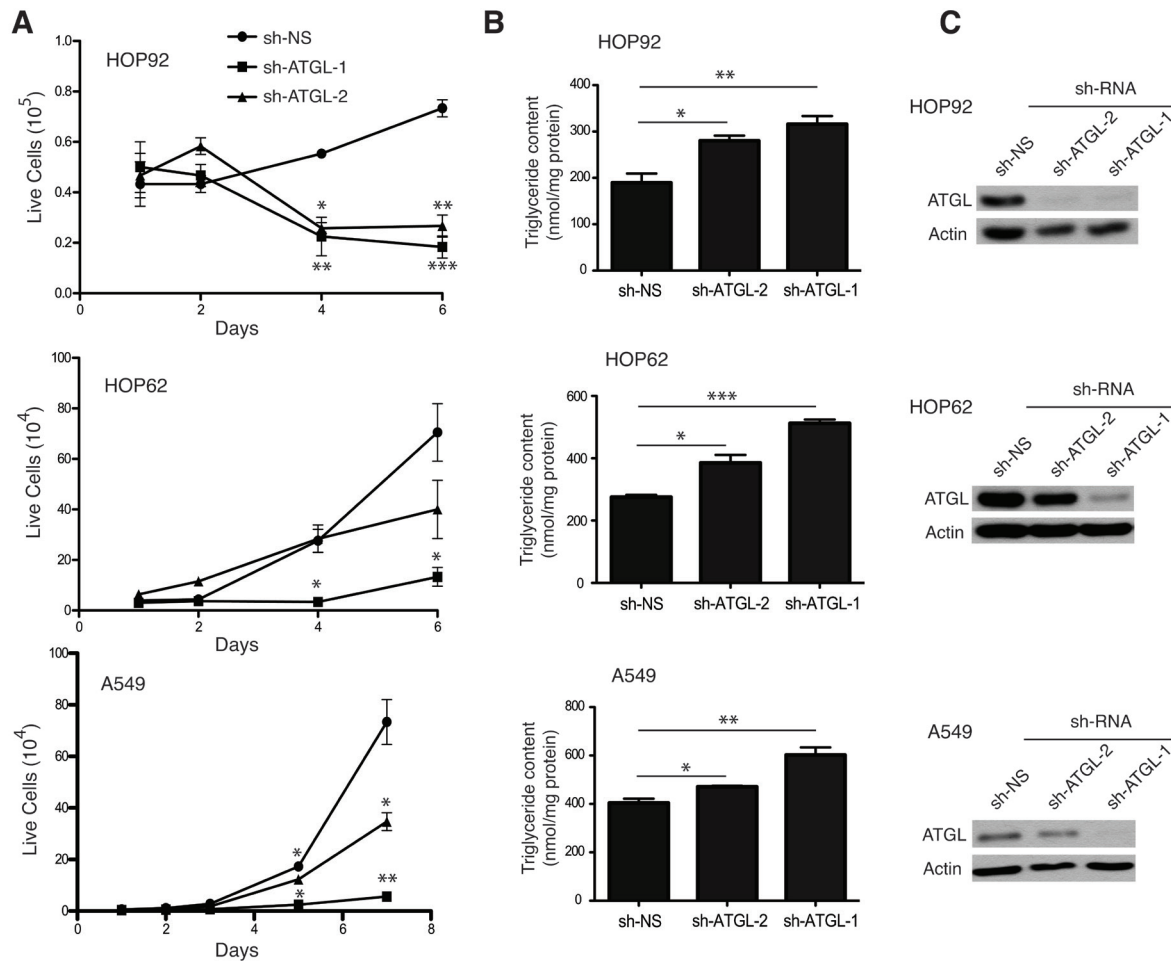

**Figure 3: ATGL knockdown inhibits cell growth of NSCL cells.** **A.** Growth curves of HOP-92, HOP-62 and A549 cells transduced with lentivirus expressing shRNAs targeting ATGL or non-silencing control (shRNA-NS). **B.** Polyclonal populations of ATGL knockdown or control cells were incubated with 400  $\mu$ M of oleic acid for 6h and the triglyceride level measured 4 hours later as described in the materials and methods. **C.** ATGL protein expression was analyzed in whole cell lysates by immunoblotting with anti-ATGL antibody. Tubulin was used as a loading control.

by chemotherapeutic agents [22], we tested if ATGL knockdown cells were similarly affected. Figure 4A and 4B shows that knockdown of ATGL in NSCL cell lines

sensitized them to cell death induced by 5-fluorouracil, camptothecin or etoposide. We then determined if knockdown of ATGL could also affect the motility of

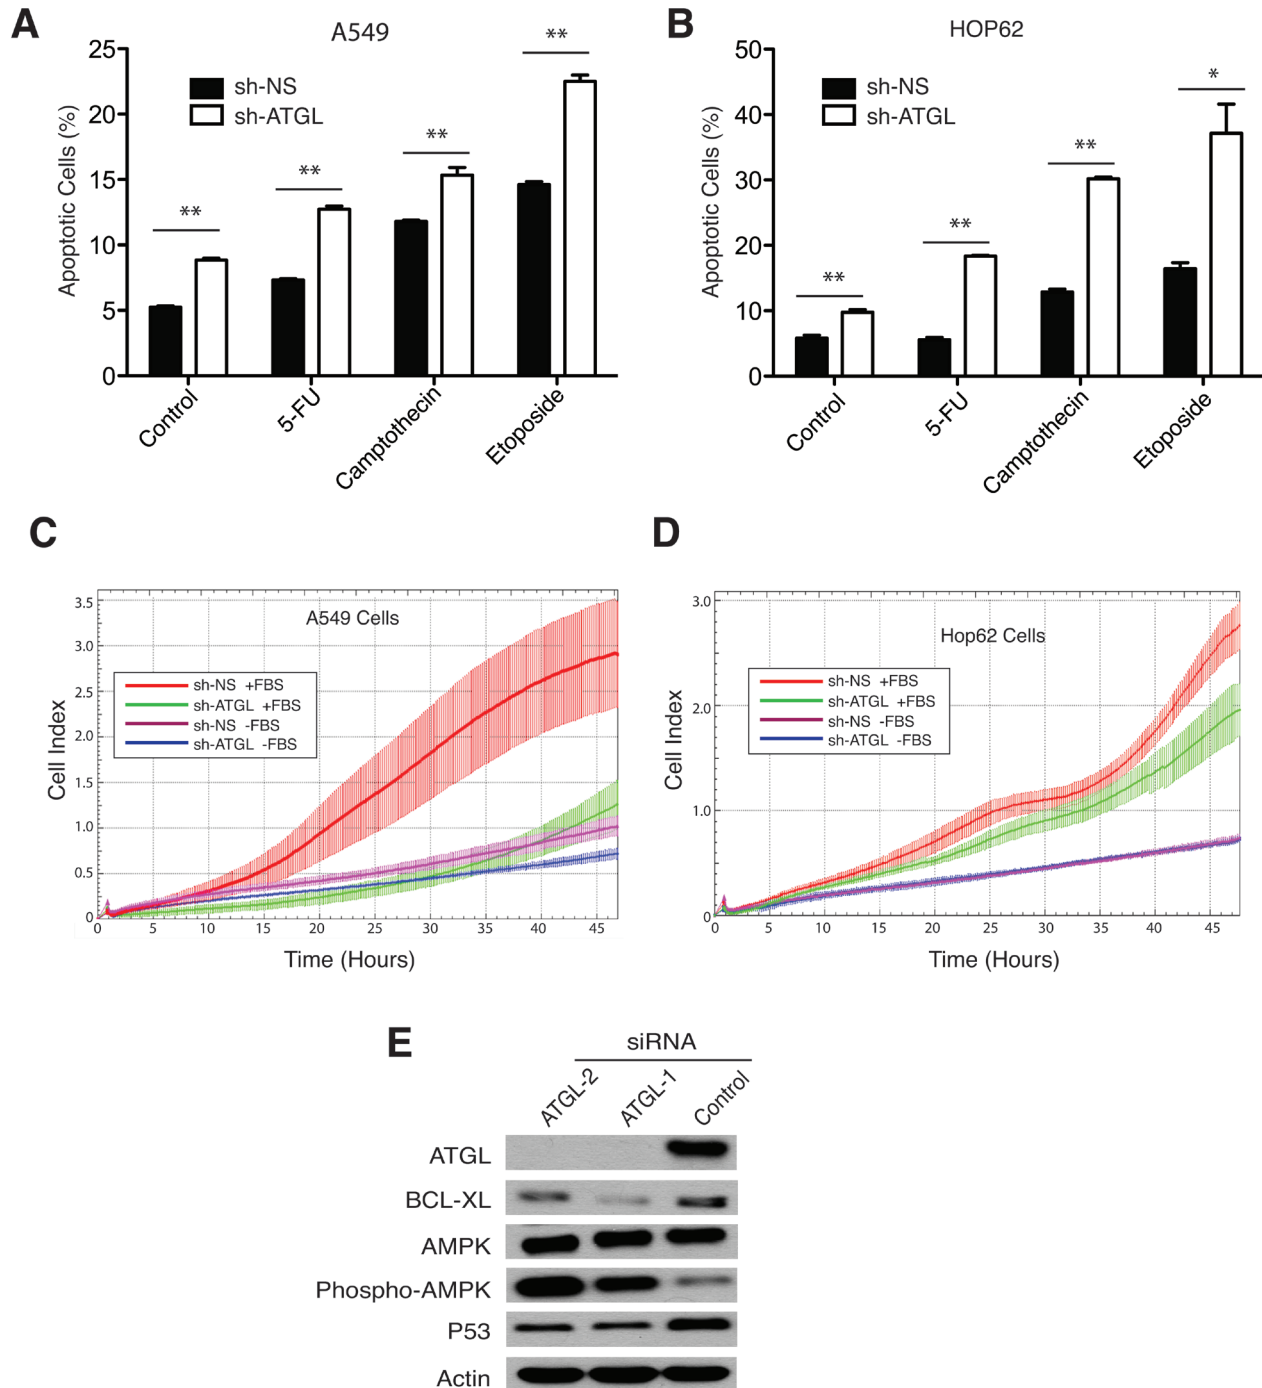

**Figure 4: ATGL knockdown promotes apoptosis and inhibits migration of NSCL cancer cells.** A.-B. The NSCL cancer cell lines A549 (panel A) and HOP62 (panel B) stably expressing an shRNA hairpin targeting ATGL (sh-ATGL) or non-silencing control (shRNA-NS) were seeded in 6-well plates and incubated for 24h with the DNA damaging-agents, 5-FU (100  $\mu$ M), Etoposide (25  $\mu$ M), Camptothecin (10  $\mu$ M) or vehicle control. Apoptosis was measured by flow cytometry using Annexin V/7AAD staining. The percentage of Annexin V positive cells is indicated for each treatment. C.-D. A modified Boyden chamber assay monitored by xCELLigence real-time cell analysis was used to measure serum-mediated migration in ATGL knockdown and control cells. Experiments were performed in the presence or absence of fetal bovine serum (FBS) to confirm the dependence of motility on serum. E. Knockdown of ATGL was performed using 2 different siRNA duplexes or a non-silencing control. Immunoblotting was used to confirm ATGL knockdown and to detect variations in BCL-XL, AMPK, phospho-AMPK and p53. Actin was used as a loading control.

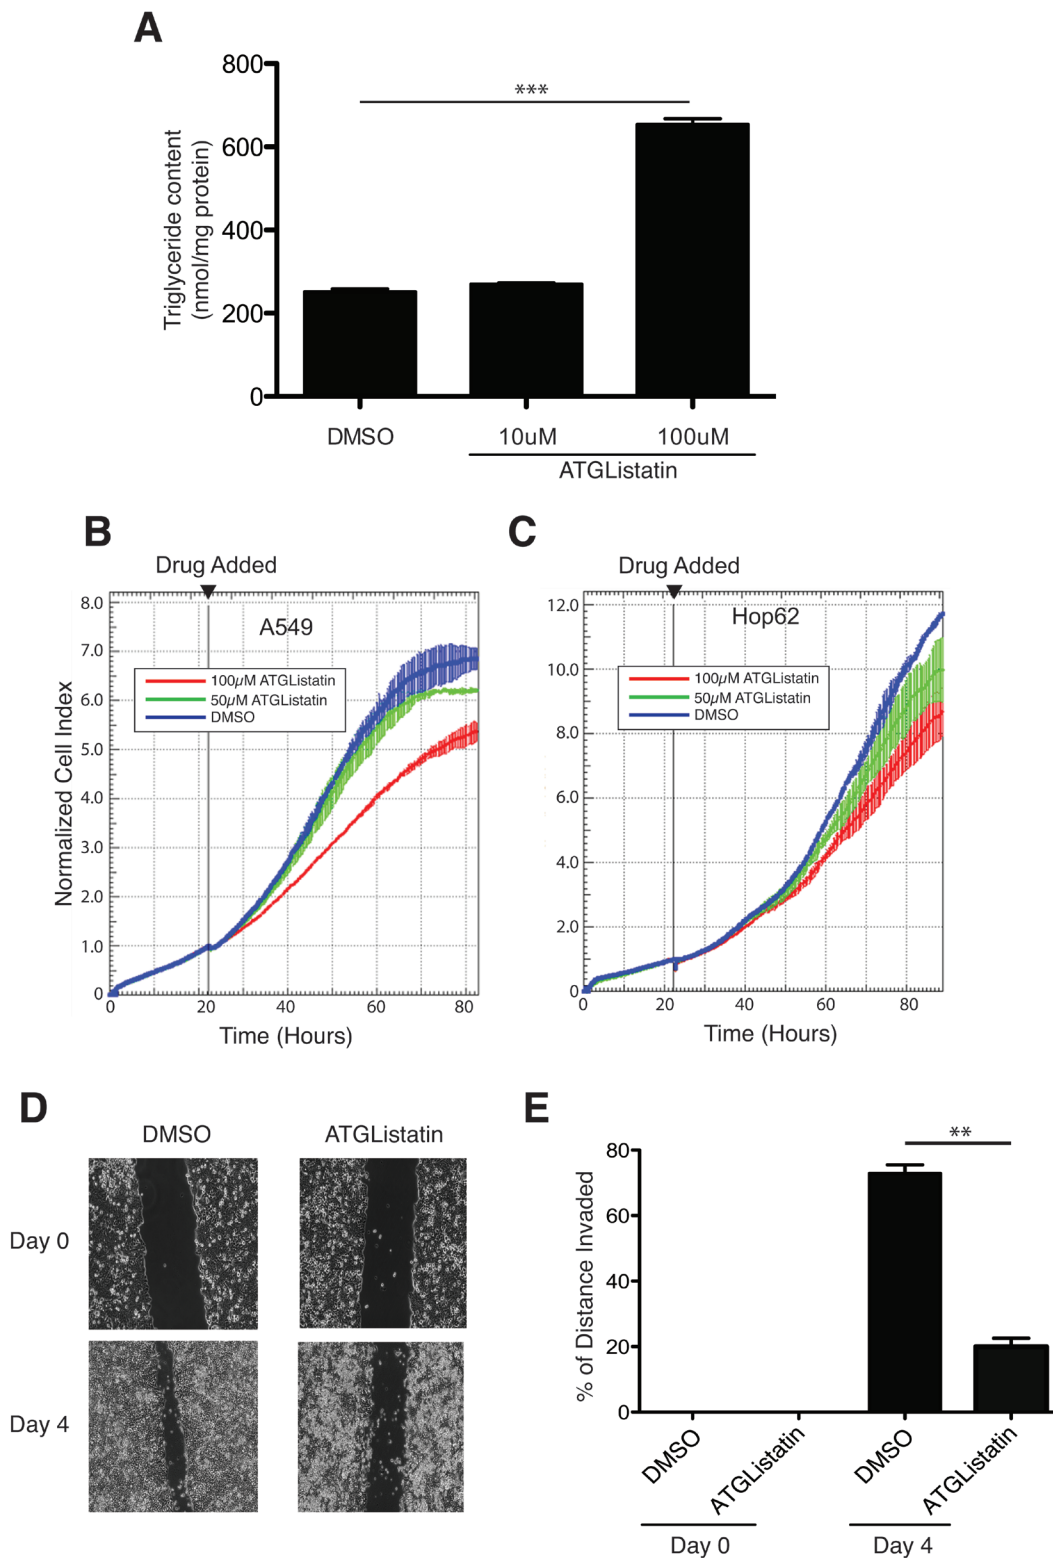

**Figure 5: A chemical inhibitor of ATGL, Atglistatin, suppresses the growth of cancer cells.** **A.** A549 cells were plated in 10 cm plates and cultured under standard conditions for 24 hours. The next day, cells were treated with the indicated concentrations of Atglistatin or vehicle control (DMSO) for another 24 hours. Media were replaced with fresh media containing 400  $\mu$ M of oleic acid and TG levels were measured after 4 hours as described in the materials and methods and. TG levels were normalized to the total protein in the cell extracts. **B.-C.** xCELLigence real-time cell analysis of A549 (panel A) and HOP62 (panel B) cells measured in the presence of the indicated concentrations of Atglistatin or vehicle control (DMSO). Time at which drug was added is indicated (22 hours after plating). **D.** *In vitro* scratch assay using Atglistatin or DMSO (vehicle) treated HT29 cells showing images captured at 0 and 4 days after scratching. **E.** Quantitation of motility from the scratch assays shown in panel D. Motility was calculated as described in the materials and methods.

NSCL cells. A modified Boyden chamber assay was used in which the xCELLigence system monitored serum-mediated motility in real-time. Figure 4C and 4D showed that knockdown of ATGL in HOP62 and A549 cells resulted in reduced motility. A recent study suggested that knockdown of ATGL in colorectal cancer cells resulted in elevated phospho-AMPK and p53 [34]. Figure 4E shows that knockdown of ATGL in A549 cells also resulted in elevated phospho-AMPK suggesting that the mechanism of slow growth may be due to activation of the p53 pathway through AMPK. Taken together, these data show that inhibition of activity of the intracellular lipase ATGL can have a significant impact on the growth, motility and sensitivity to cell death of NSCL cells.

### A chemical inhibitor of ATGL suppresses the growth of tumor cells

Findings from several groups demonstrated that expression of G0S2 is silenced across a wide-range of tumor types. Since G0S2 acts as an endogenous inhibitor of ATGL activity, it is possible that elevated ATGL activity is a general property of cancer cells and thus represents an attractive target for therapeutic intervention. Recently, a highly specific inhibitor of ATGL activity was developed termed Atglistatin that was shown to be effective both

*in vivo* and *in vitro* [35]. Atglistatin was shown to be a highly selective inhibitor for ATGL without affecting other intracellular lipases such as MAGL or HSL. As expected, treatment with Atglistatin also resulted in the accumulation of TG in cells confirming that enzymatic activity of ATGL was being effectively inhibited (Figure 5A). We therefore determined if Atglistatin was also able to inhibit the growth of NSCL lines. Figure 5B and 5C show that Atglistatin was able to inhibit the growth of A549 and HOP62 cells in a concentration dependent manner. Since we showed in Figure 2 that G0S2 could inhibit the motility of HT29 cells, we performed the same assay using Atglistatin. Figure 5D and 5E show that Atglistatin was able to inhibit the motility of HT29 cells using a scratch assay. These results show that a specific small molecule inhibitor of ATGL can slow the growth of cancer cells and that ATGL is a potential target for chemotherapy.

### ATGL inhibition by G0S2 partially mediates the therapeutic effects of all-trans retinoic acid in acute promyelocytic leukemia

A previous study has shown that *G0S2* mRNA and protein is strongly induced in response to treatment with all-*trans* retinoic acid (ATRA) in Acute Promyelocytic

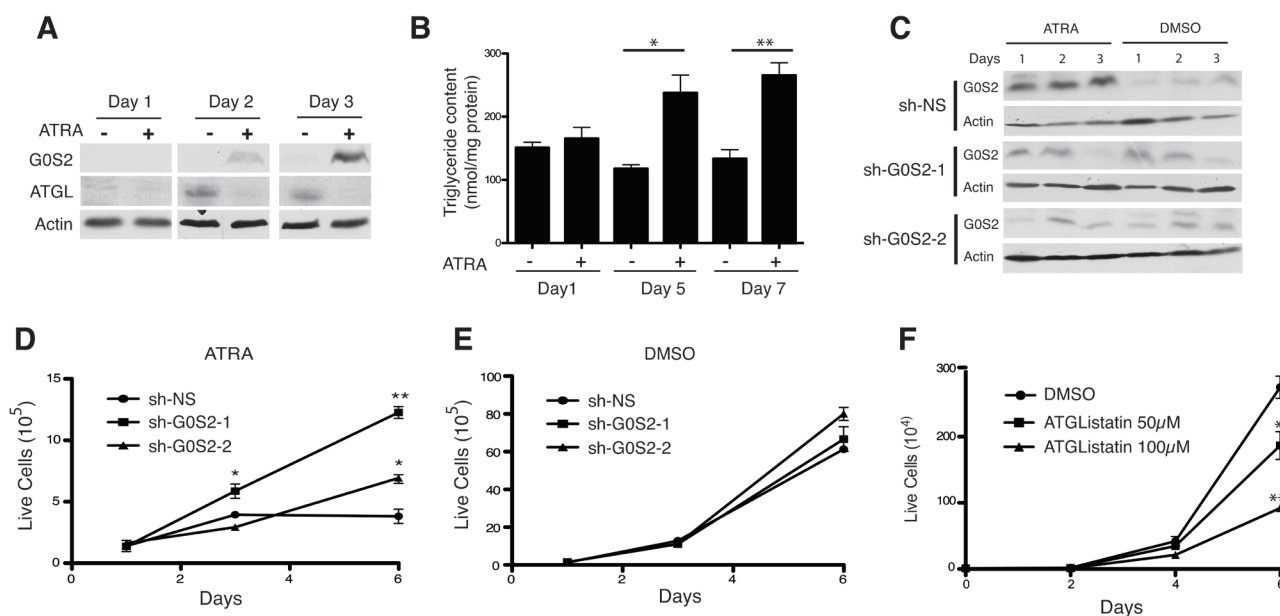

**Figure 6: ATRA-mediated growth arrest depends on upregulating G0S2 in NB4 cells.** **A.** NB4 cells were treated with 1  $\mu$ M ATRA and at the indicated time points equal amounts of total cell lysates were immunoblotted with anti-G0S2 and anti-ATGL.  $\beta$ -actin was used as a loading control. **B.** NB4 cells were incubated in 1  $\mu$ M ATRA for the indicated times and the intracellular triglyceride content was determined as described in the materials and methods and. The data were normalized with total protein amounts in the cell extracts. **C.** NB4 cells stably expressing shRNAs targeting G0S2 (sh-G0S2) or non-silencing (sh-NS) control were cultured in 1  $\mu$ M ATRA or vehicle control (DMSO). Knockdown efficiency was examined in whole-cell lysates by immunoblotting with anti-G0S2.  $\beta$ -actin was used as a loading control. **D.-E.** Growth curves of sh-G0S2 and sh-NS NB4 cells in the presence of 1  $\mu$ M ATRA (panel D) or vehicle control (panel E). **F.** Growth curves of NB4 cells treated with the indicated concentrations of Atglistatin or vehicle control (DMSO).



Leukemia (APL) cells [36]. ATRA is the frontline therapy for APL and the induction of *G0S2* expression in this system suggests that the tumor suppressor properties of the protein may play a role in the response to the drug. We confirmed previous observations showing that treatment of the APL cell line NB4 with ATRA results in the potent induction of *G0S2* protein over three days (Figure 6A). Intriguingly, whereas levels of *G0S2* are elevated with ATRA treatment, we observed *ATGL* levels are decreased. This suggests that suppression of TG metabolism is an important process in the differentiation program induced by ATRA. Endogenous TG levels in NB4 cells treated with ATRA were significantly elevated after 5 and 7 days of ATRA treatment relative to DMSO treated-controls (Fig. 6B). This result indicates that *G0S2* induction in NB4 cells resulted in inhibition of *ATGL* activity as shown by increased TG levels.

In order to determine if *G0S2* expression plays a role in the response of NB4 cells to ATRA, we transduced these cells with two different lentivirus vectors encoding shRNAs targeting *G0S2*. Figure 6C shows that both shRNA constructs were able to attenuate the induction of *G0S2* in response to ATRA. Interestingly, NB4 cells in which *G0S2* is silenced were significantly more resistant to ATRA-induced growth arrest than control cells expressing a non-silencing control (Figure 6D and 6E) suggesting that *G0S2* is required at least in part for the inhibition of cell growth in response to ATRA. Furthermore, treatment of NB4 cells with Atglistatin in the absence of ATRA was also able to inhibit NB4 cell growth (Figure 6F). Taken together these data show that the induction of *G0S2* expression during ATRA differentiation therapy of PML inhibits TG catabolism and cell growth.

## DISCUSSION

The *G0S2* gene has the general properties of a tumour suppressor and has been shown to be a potent negative regulator of triglyceride catabolism. In the current study we show for the first time that the inhibition of *ATGL* by *G0S2* can significantly reduce the growth and motility of a variety of tumour cell lines. Furthermore, inhibition of *ATGL* using either RNAi or a chemical inhibitor can similarly slow the growth of tumor cells. Since *G0S2* expression is reduced in such a wide range of cancer cell types, this implies that elevated *ATGL* activity may be a common property of cancer cells and may represent a novel target for cancer therapy. These observations also highlight the growing importance of altered lipid metabolism in the process of cell transformation and cancer.

The reason(s) why inhibition of intracellular lipase activity may interfere with cell division have yet to be fully explained. A recent paper demonstrated that Monoacylglycerol lipase (MAGL) activity is upregulated in some cancer cells thus rendering tumors derived from

these cells more aggressive [15]. In the same study, elevated MAGL activity was shown to increase production of fatty acid derived signaling molecules, which in turn enhances cell growth and motility. MAGL is the last step in TG catabolism resulting in glycerol and non-esterified fatty acids as final products. Since *ATGL* is the first step in TG catabolism, it is tempting to speculate that observed increases in MAGL activity may be due to loss of *G0S2* in cancer cells, leading to enhanced *ATGL* activity by generating substrates for MAGL. An obvious explanation for reduced cell growth caused by *ATGL* inhibition would simply be the loss of a potent energy source. The intense energy demands of rapidly dividing cells may necessitate tapping the dense energy pools stored in triglycerides and *G0S2* may function as a checkpoint preventing access to energy supplied by oxidation of fatty acids.

Study of the yeast ortholog of *ATGL* (*Tgl4*) has shown that lipase activity of *Tgl4* is required for proper cell cycle progression. *Tgl4* activity was shown to be activated through phosphorylation by the cyclin-dependent kinase *Cdk1/Cdc28* (ortholog of mammalian *Cdc2*). Interestingly, mutation of the *Cdk1* phosphorylation sites on *Tgl4* resulted in delayed cell cycle entry [37]. It remains to be determined if lipolysis in mammals is under similar cell cycle control, however, examination of the primary amino acid sequence of mammalian *ATGL* reveals that *cdk1* consensus sites exist at serine 185 and threonine 489. In the case of yeast, activation of lipase activity occurs at the G1/S transition of the cell cycle, which coincides with bud emergence, which requires increased amounts of fatty acids. Yeast does not appear to have a homolog of *G0S2* but the requirement for precise regulation of *ATGL*-like activity during the cell cycle establishes an intriguing precedent and it will be interesting to determine if similar regulation occurs in mammals.

Our results showing that *ATGL* knockdown can inhibit cell growth is in accordance with a recent study by Ou et al. who showed that knockdown of *ATGL* in HCT116 colorectal cancer cells resulted in a slow growth phenotype and elevated phospho-AMPK and p53 [34]. Intriguingly, in the same study the authors observed that knockdown of the *ATGL* co-activator, *cgi-58* (also known as *Abhd5*) resulted in cellular transformation and enhanced growth and cell motility. The opposite phenotype of *cgi-58* knockdown suggests that this protein has tumour suppressor effects that are independent of *ATGL*.

A recent study demonstrated that *G0S2* is able to suppress the growth of the chronic myeloid leukemia (CML) cell line, K562 both *in vitro* and in mouse xenografts [30]. Like in many other tumor cells, the promoter of *G0S2* was shown to be methylated in K562 cells is reversed using the methylation inhibitor 5-Azacytadine (5-Aza). In this study the authors propose that the mechanism of action of *G0S2* was through interaction with nucleolin, which caused the retention of nucleolin in the cytosol and inhibits its growth promoting

functions. The same group also demonstrated that G0S2 was able to maintain quiescence of hematopoietic stem cells also through interaction with nucleolin [29]. Consistent with these findings, G0S2 was found to be a target of all-trans retinoic acid (ATRA) in human acute promyelocytic leukemia (APL) cells [38]. ATRA treatment induces terminal differentiation of APL cells and is known to be a highly effective therapy against this form of leukemia (reviewed in [39]). Both mRNA and protein levels of G0S2 were rapidly induced in APL cell line, NB4, and in APL transgenic mice treated with ATRA [38]. In our current study we demonstrate that induction of G0S2 expression in NB4 cells results in elevated TG levels that are likely due to inhibition of ATGL. In addition, knockdown of G0S2 attenuated the effects of ATRA and inhibition of ATGL alone was able to inhibit the growth of NB4 cells. Although several binding partners have been shown for G0S2 including Bcl2 [22], ATGL [19] and Nucleolin [29], our studies suggest that inhibition of ATGL can attenuate cell growth in a wide range of tumour cells and is an important mechanism of G0S2-mediated growth inhibition.

Impressively, over the past few months there has been a succession of four papers independently describing the phenotype of a G0S2 knockout mouse [31-33, 40]. For the most part, each of these studies support the view that G0S2 is a key regulator of lipolysis *in vivo*. G0S2 knockout mice are lean, resistant to obesity by high fat feeding, glucose tolerant, insulin sensitive, and are more thermogenic. Although no studies have thus far reported experiments examining tumour growth in these mice, considering the tumour suppressor properties that the protein appears to have, such experiments would be informative. Studies using knockout mice of ATGL, however, have already revealed interesting insights into cancer biology. ATGL knockout mice were shown to be resistant to cancer cachexia indicating that complex though poorly understood interactions exist between lipid catabolism and tumor biology [41].

## MATERIALS AND METHODS

### Cell lines and drugs

A549, HOP62 and HOP92 and NB4 cells were maintained in RPMI-1640 (Wisent Inc., QC, Canada). HT29 cells were maintained in Dulbecco's modified Eagle medium (Wisent Inc., QC, Canada). All media were supplemented with 10% fetal bovine serum (HyClone; Thermo Fisher Scientific Inc.) and 0.1% gentamicin (Wisent Inc., QC, Canada). 1  $\mu$ M ATRA (Sigma-Aldrich) was added to induce differentiation of NB4 cells. Oleic acid-BSA was purchased from Sigma-Aldrich Co.

### Lentivirus

shRNAs used in this study were expressed from the pLKO vector and were all obtained from Sigma-Aldrich. Identifiers for each of the vectors are as follows: sh-ATGL-1 (NM\_020376.2-721s1c1), sh-ATGL-2 (NM\_020376.2-718s1c2), sh-G0S2-1 (NM\_015714.2-712s1c1), sh-G0S2-2 (NM\_015714.2-708s1c1), and SHC002 non-silencing control. Lentiviruses were produced by cotransfection of 293T/17 cells using calcium phosphate coprecipitation with pLKO (shRNA vectors), pCMV-dR8.2 dVPR (Addgene plasmid # 8455), and pCMV-VSV-G (Addgene plasmid # 8455) as described previously [42, 43]. The virus-containing supernatant was then collected, filtered through a 0.22- $\mu$ m filter, and stored as aliquots at  $-80^{\circ}\text{C}$  until further use. Adherent cells were infected with lentivirus on 60-mm dishes. 24 hours after plating, 300  $\mu$ l virus-containing medium was added in the presence of 10  $\mu$ g/ml Polybrene. 24 hours post infection the cells were trypsinized and replated in 10-cm dishes. 24 hours after plating, the cells were selected for 48 hours in 1  $\mu$ g/ml puromycin (Wisent Inc., QC, Canada) before being used for experiments. NB4 cell infections were performed in sterile 15 ml conical tubes by adding 0.5 ml of lentivirus supernatant with 10  $\mu$ g/ml Polybrene. Cells were centrifuged at 2000 RPM for 1.5 hours at  $37^{\circ}\text{C}$ . Virus-containing medium was aspirated and 2ml of fresh media was added to the cells and plated in a 6 well plate. After 24 hours, cells were selected in media containing 1  $\mu$ g/ml puromycin.

### Retrovirus

The open reading frame of G0S2 was subcloned from the previously described vector, pCDNA3-G0S2 [22], and ligated into the retroviral vector pBABE including a FLAG epitope tag. Retrovirus particles were produced by cotransfection of 293T cells with pBABE vectors, pCL-Eco and pCMV-VSV-G (Addgene plasmid # 8454). The virus-containing supernatant was collected and stored at  $-80^{\circ}\text{C}$  until further use. To establish polyclonal cells stably expressing G0S2, HOP62 and A549 cells were seeded and infected as described above for lentivirus infection.

### Apoptosis assays

Polyclonal cell populations stably expressing shRNAs against ATGL or non-silencing control cells; or stably expressing G0S2-Flag or Empty Vector-Flag, were plated on 6 well plates. The cells were then treated without vehicle; control or with 5FU (100  $\mu$ M), Camptothecin (10  $\mu$ M) or Etoposide (25  $\mu$ M) as indicated in the figure legends. Drugs were purchased from Sigma Aldrich. The

cells were stained by washing once with PBS and once with AnnexinV binding buffer (2.5 mM CaCl<sub>2</sub>, 140 mM NaCl, 7.75 mM HEPES [pH 7.4]) and then incubated with 200 µl AnnexinV binding buffer containing 5 µl AnnexinV (BD Biosciences) and 0.25 µg 7-amino-actinomycin D (7AAD) (A.G. Scientific). The cells were analyzed on a Cell Lab Quanta SC flow cytometer (Beckman Coulter).

### Antibodies and western blotting

Anti-FLAG M2 (Cat# F1804), tubulin (Cat# T5168) and actin (Cat# A2066) antibodies were obtained from Sigma-Aldrich. The rabbit anti-ATGL antibody was obtained from Cayman Chemicals. Anti-p53 (DO-1) was purchased from Santa Cruz Biotechnology. Anti-Bcl-XL (Cat# 2762S), Anti-AMPK (Cat# 2532) and phospho-AMPK (Cat# 2535S) were obtained from Cell Signaling. The rabbit polyclonal antibody against G0S2 has been described previously [44]. Whole-cell extracts were obtained by harvesting cells and boiling in 1X Laemmli buffer. Western blotting was performed using standard protocols for SDS-PAGE and wet transfer onto nitrocellulose membranes (Bio-Rad).

### Measurement of intracellular TG content

Triglyceride accumulation was measured using a Triglyceride Quantification Colorometric/Fluorometric kit from BioVision Incorporated. Briefly, 10 million cells were homogenized in a solution containing 5% NP-40 in water. The samples were heated at 100 °C until the NP-40 becomes cloudy and cooled down after to room temperature. Another heating cycle was repeated to solubilize all triglyceride. Samples were briefly centrifuged to remove any insoluble material and diluted 10 fold with water before assaying. The samples were measured using the manufactures protocol. The sample O.D. was measured at 570nm in a microtiter plate reader. TG concentration was calculated from a standard curve for each assay. Data shown is normalized to total cellular protein.

### Scratch assays

HT29 cells stably expressing G0S2 shRNAs or non-silencing control (sh-NS) were plated to create a confluent monolayer on a 6 well plate. The monolayer was scratched with a p200 pipet tip and the edges were smoothed by washing the cells once with growth medium. Cells were cultured at 37°C and time lapse photographs taken over two days at several points in each scratch using a Zeiss Axiovert fluorescence microscope. The results are represented as percentage of distance invaded. If width of the scratch at day 0 = D0, width of scratch at day 2 = D2,

then percentage of distance invaded =  $(D0 - D2) / D0 \times 100$ . For the ATGListatin experiment, the scratch was made in a confluent HT29 cells grown on a 6 well plate. 100 µM of ATGListatin or DMSO (control) was added to the cells and cultured for four days.

### Immunoprecipitation

A polyclonal population of A549 cells stably expressing G0S2-Flag or empty vector control (EV) were trypsinized and washed with cold PBS. The cells were lysed in a buffer containing 50mM Tris-HCl (pH 8.0), 135mM NaCl, 10 mM NaF, 1% NP-40, 1.0 mM EDTA, 5% glycerol and protease inhibitor (Roche Diagnostics, Laval, QC, Canada) on ice for 20 min. Cell debris was pelleted by centrifugation and the supernatant was then incubated with 30 µl EZview red anti-FLAG M2 affinity gel (Sigma-Aldrich) for 2 h at 4 °C. The beads were then pelleted and washed four times with lysis buffer. The beads were pelleted and resuspended in 1×Laemmli sample buffer and boiled for 5 min prior to immunoblotting analysis.

### Cell growth assays

For all the proliferation assays, equal number of cells were seeded in 12-wells plates and counted at the indicated time points. Trypan blue was used to distinguish live cells from dead ones. The growth curves are shown as an average of 3-4 biological replicates.

### xCELLigence real-time cell analysis (RTCA)

Experiments were carried out using the xCELLigence RTCA DP instrument (Roche Diagnostics GmbH, Mannheim, Germany) which was placed in a humidified incubator at 37°C and 5% CO<sub>2</sub>. Invasion assays were performed using CIM-16 plates (Roche Diagnostics GmbH, Mannheim, Germany) according to the manufacture protocols.  $5 \times 10^4$  cells were seeded in the upper chamber and each experimental condition was performed in quadruplicate with a programmed signal detection every five minutes over 72 hours of incubation. Experiments measuring cytotoxicity of Atglistatin were performed using E-plates (Roche Diagnostics GmbH, Mannheim, Germany) according to the manufacture's protocols. 5000 HOP62 or 4000 A549 cells undergoing exponential growth were seeded in each well. Cell Index value (CI) of each well was monitored every 15 min. For drug treatment, 22 hours after seeding, cells were treated over a period of 72 hours with the indicated concentrations of Atglistatin (Cayman Chemical Company, MI, USA). All data was recorded using the supplied RTCA software (vs. 1.2.1). CI-data from cell growth experiments have been

normalized using the RTCA software prior to the start of treatment.

## Statistics

All data is presented as the mean  $\pm$ SEM. Where indicated statistical testing was performed using the 2-tailed *t*-test on 3 or more replicates. (\* indicates  $p \leq 0.05$ , \*\*  $p \leq 0.01$ , \*\*\* $p \leq 0.001$ ).

## ACKNOWLEDGMENTS

This work was supported by operating grants from the Canadian Institutes of Health Research (CIHR), (MOP-115195) and Cancer Research Society (CRS) to JGT.

## FINANCIAL SUPPORT

This work was supported by grants from the Canadian Institutes of Health Research (CIHR), (MOP-115195) and Cancer Research Society (CRS) to JGT.

## CONFLICTS OF INTEREST

There is no conflict of interest.

## REFERENCES

1. Hanahan D and Weinberg RA. Hallmarks of cancer: the next generation. *Cell*. 2011; 144:646-674.
2. Gatenby RA and Gillies RJ. Why do cancers have high aerobic glycolysis? *Nature reviews Cancer*. 2004; 4:891-899.
3. Hatzivassiliou G, Zhao F, Bauer DE, Andreadis C, Shaw AN, Dhanak D, Hingorani SR, Tuveson DA and Thompson CB. ATP citrate lyase inhibition can suppress tumor cell growth. *Cancer cell*. 2005; 8:311-321.
4. Brusselmans K, De Schrijver E, Verhoeven G and Swinnen JV. RNA interference-mediated silencing of the acetyl-CoA-carboxylase- $\alpha$  gene induces growth inhibition and apoptosis of prostate cancer cells. *Cancer Research*. 2005; 65:6719-6725.
5. Halperin ML, Taylor WM, Cheema-Dhadli S, Morris JP and Fritz IB. Effects of fasting on the control of fatty-acid synthesis in hepatoma 7777 and host liver. Role of long-chain fatty acyl-CoA, the mitochondrial citrate transporter and pyruvate dehydrogenase activity. *European Journal of Biochemistry*. 1975; 50:517-522.
6. Rao KN, Elm MS, Kelly RH, Chandar N, Brady EP, Rao B, Shinozuka H and Eagon PK. Hepatic hyperplasia and cancer in rats: metabolic alterations associated with cell growth. *Gastroenterology*. 1997; 113:238-248.
7. Kuhajda FP, Jenner K, Wood FD, Hennigar RA, Jacobs LB, Dick JD and Pasternack GR. Fatty acid synthesis: a potential selective target for antineoplastic therapy. *Proceedings of the National Academy of Sciences of the United States of America*. 1994; 91:6379-6383.
8. Alli PM, Pinn ML, Jaffee EM, McFadden JM and Kuhajda FP. Fatty acid synthase inhibitors are chemopreventive for mammary cancer in neu-N transgenic mice. *Oncogene*. 2005; 24:39-46.
9. Menendez JA, Colomer R and Lupu R. Why does tumor-associated fatty acid synthase (oncogenic antigen-519) ignore dietary fatty acids? *Medical Hypotheses*. 2005; 64:342-349.
10. Zimmermann R, Strauss JG, Haemmerle G, Schoiswohl G, Birner-Gruenberger R, Riederer M, Lass A, Neuberger G, Eisenhaber F, Hermetter A and Zechner R. Fat mobilization in adipose tissue is promoted by adipose triglyceride lipase. *Science*. 2004; 306:1383-1386.
11. Villena JA, Roy S, Sarkadi-Nagy E, Kim KH and Sul HS. Desnutrin, an adipocyte gene encoding a novel patatin domain-containing protein, is induced by fasting and glucocorticoids: ectopic expression of desnutrin increases triglyceride hydrolysis. *The Journal of biological chemistry*. 2004; 279:47066-47075.
12. Jenkins CM, Mancuso DJ, Yan W, Sims HF, Gibson B and Gross RW. Identification, cloning, expression, and purification of three novel human calcium-independent phospholipase A2 family members possessing triacylglycerol lipase and acylglycerol transacylase activities. *The Journal of biological chemistry*. 2004; 279:48968-48975.
13. Hollenberg CH, Raben MS and Astwood EB. The lipolytic response to corticotropin. *Endocrinology*. 1961; 68:589-598.
14. Vaughan M, Berger JE and Steinberg D. Hormone-Sensitive Lipase and Monoglyceride Lipase Activities in Adipose Tissue. *The Journal of biological chemistry*. 1964; 239:401-409.
15. Nomura DK, Long JZ, Niessen S, Hoover HS, Ng SW and Cravatt BF. Monoacylglycerol lipase regulates a fatty acid network that promotes cancer pathogenesis. *Cell*. 2010; 140:49-61.
16. Gjerstorff MF, Benoit VM, Laenholm AV, Nielsen O, Johansen LE and Ditzel HJ. Identification of genes with altered expression in medullary breast cancer vs. ductal breast cancer and normal breast epithelia. *International journal of oncology*. 2006; 28:1327-1335.
17. Nomura DK, Lombardi DP, Chang JW, Niessen S, Ward AM, Long JZ, Hoover HH and Cravatt BF. Monoacylglycerol lipase exerts dual control over endocannabinoid and fatty acid pathways to support prostate cancer. *Chem Biol*. 2011; 18:846-856.
18. Ye L, Zhang B, Seviour EG, Tao KX, Liu XH, Ling Y, Chen JY and Wang GB. Monoacylglycerol lipase (MAGL) knockdown inhibits tumor cells growth in colorectal cancer.

Cancer Letters. 2011; 307:6-17.

19. Yang X, Lu X, Lombes M, Rha GB, Chi YI, Guerin TM, Smart EJ and Liu J. The G(0)/G(1) switch gene 2 regulates adipose lipolysis through association with adipose triglyceride lipase. *Cell Metabolism*. 2010; 11:194-205.
20. Russell L and Forsdyke DR. A human putative lymphocyte G0/G1 switch gene containing a CpG-rich island encodes a small basic protein with the potential to be phosphorylated. *DNA and cell biology*. 1991; 10:581-591.
21. Siderovski DP, Blum S, Forsdyke RE and Forsdyke DR. A set of human putative lymphocyte G0/G1 switch genes includes genes homologous to rodent cytokine and zinc finger protein-encoding genes. *DNA and cell biology*. 1990; 9:579-587.
22. Welch C, Santra MK, El-Assaad W, Zhu X, Huber WE, Keys RA, Teodoro JG and Green MR. Identification of a protein, G0S2, that lacks Bcl-2 homology domains and interacts with and antagonizes Bcl-2. *Cancer Research*. 2009; 69:6782-6789.
23. Rosen ED. The molecular control of adipogenesis, with special reference to lymphatic pathology. *Annals of the New York Academy of Sciences*. 2002; 979:143-158; discussion 188-196.
24. Lu X, Yang X and Liu J. Differential control of ATGL-mediated lipid droplet degradation by CGI-58 and G0S2. *Cell cycle*. 2010; 9:2719-2725.
25. Tokumaru Y, Yamashita K, Osada M, Nomoto S, Sun DI, Xiao Y, Hoque MO, Westra WH, Califano JA and Sidransky D. Inverse correlation between cyclin A1 hypermethylation and p53 mutation in head and neck cancer identified by reversal of epigenetic silencing. *Cancer Research*. 2004; 64:5982-5987.
26. Noushmehr H, Weisenberger DJ, Diefes K, Phillips HS, Pujara K, Berman BP, Pan F, Pelloski CE, Sulman EP, Bhat KP, Verhaak RG, Hoadley KA, Hayes DN, Perou CM, Schmidt HK, Ding L, et al. Identification of a CpG island methylator phenotype that defines a distinct subgroup of glioma. *Cancer cell*. 2010; 17:510-522.
27. Kusakabe M, Kutomi T, Watanabe K, Emoto N, Aki N, Kage H, Hamano E, Kitagawa H, Nagase T, Sano A, Yoshida Y, Fukami T, Murakawa T, Nakajima J, Takamoto S, Ota S, et al. Identification of G0S2 as a gene frequently methylated in squamous lung cancer by combination of in silico and experimental approaches. *International Journal of Cancer*. 2010; 126:1895-902.
28. Kusakabe M, Watanabe K, Emoto N, Aki N, Kage H, Nagase T, Nakajima J, Yatomi Y, Ohishi N and Takai D. Impact of DNA demethylation of the G0S2 gene on the transcription of G0S2 in squamous lung cancer cell lines with or without nuclear receptor agonists. *Biochemical and Biophysical Research Communications*. 2009; 390:1283-1287.
29. Yamada T, Park CS, Burns A, Nakada D and Lacorazza HD. The cytosolic protein G0S2 maintains quiescence in hematopoietic stem cells. *PloS one*. 2012; 7:e38280.
30. Yamada T, Park CS, Shen Y, Rabin KR and Lacorazza HD. G0S2 inhibits the proliferation of K562 cells by interacting with nucleolin in the cytosol. *Leuk Res*. 2013.
31. El-Assaad W, El-Kouhen K, Mohammad AH, Yang J, Morita M, Gamache I, Mamer O, Avizonis D, Hermance N, Kersten S, Tremblay ML, Kelliher MA and Teodoro JG. Deletion of the gene encoding G/G switch protein 2 (G0s2) alleviates high-fat-diet-induced weight gain and insulin resistance, and promotes browning of white adipose tissue in mice. *Diabetologia*. 2015;58:149-57.
32. Ma T, Lopez-Aguilar AG, Li A, Lu Y, Sekula D, Nattie EE, Freemantle S and Dmitrovsky E. Mice lacking G0S2 are lean and cold-tolerant. *Cancer biology & therapy*. 2014; 15:643-650.
33. Zhang X, Xie X, Heckmann BL, Saarinen AM, Czyzyk TA and Liu J. Targeted disruption of G0/G1 switch gene 2 enhances adipose lipolysis, alters hepatic energy balance, and alleviates high-fat diet-induced liver steatosis. *Diabetes*. 2014; 63:934-946.
34. Ou J, Miao H, Ma Y, Guo F, Deng J, Wei X, Zhou J, Xie G, Shi H, Xue B, Liang H and Yu L. Loss of abhd5 promotes colorectal tumor development and progression by inducing aerobic glycolysis and epithelial-mesenchymal transition. *Cell reports*. 2014; 9:1798-1811.
35. Mayer N, Schweiger M, Romauch M, Grabner GF, Eichmann TO, Fuchs E, Ivkovic J, Heier C, Mrak I, Lass A, Hofler G, Fledelius C, Zechner R, Zimmermann R and Breinbauer R. Development of small-molecule inhibitors targeting adipose triglyceride lipase. *Nature chemical biology*. 2013; 9:785-787.
36. Kitareewan S, Blumen S, Sekula D, Bissonnette RP, Lamph WW, Cui Q, Gallagher R and Dmitrovsky E. G0S2 is an all-trans-retinoic acid target gene. *International journal of oncology*. 2008; 33(2):397-404.
37. Kurat CF, Wolinski H, Petschnigg J, Kaluarachchi S, Andrews B, Natter K and Kohlwein SD. Cdk1/Cdc28-dependent activation of the major triacylglycerol lipase Tgl4 in yeast links lipolysis to cell-cycle progression. *Molecular Cell*. 2009; 33:53-63.
38. Kitareewan S, Blumen S, Sekula D, Bissonnette RP, Lamph WW, Cui Q, Gallagher R and Dmitrovsky E. G0S2 is an all-trans-retinoic acid target gene. *International Journal of Oncology*. 2008; 33:397-404.
39. Wang ZY and Chen Z. Acute promyelocytic leukemia: from highly fatal to highly curable. *Blood*. 2008; 111:2505-2515.
40. Choi H, Lee H, Kim TH, Kim HJ, Lee YJ, Lee SJ, Yu JH, Kim D, Kim KS, Park SW and Kim JW. G0/G1 switch gene 2 has a critical role in adipocyte differentiation. *Cell death and differentiation*. 2014; 21:1071-1080.
41. Das SK, Eder S, Schauer S, Diwoy C, Temmel H, Guertl B, Gorkiewicz G, Tamilarasan KP, Kumari P, Trauner M, Zimmermann R, Vesely P, Haemmerle G, Zechner R and Hoefler G. Adipose triglyceride lipase contributes to cancer-

associated cachexia. *Science*. 2011; 333:233-238.

42. Kucharski TJ, Gamache I, Gjoerup O and Teodoro JG. DNA damage response signaling triggers nuclear localization of the chicken anemia virus protein Apoptin. *Journal of Virology*. 2011; 85:12638-12649.
43. Stewart SA, Dykxhoorn DM, Palliser D, Mizuno H, Yu EY, An DS, Sabatini DM, Chen IS, Hahn WC, Sharp PA, Weinberg RA and Novina CD. Lentivirus-delivered stable gene silencing by RNAi in primary cells. *RNA*. 2003; 9:493-501.
